# Supplementary material for: Autoxidation of 2-alkylidene-1,3-cyclohexanediones as a green process to form bicyclic hemiketal endoperoxides
Source: Royal Society of Chemistry journal article supplement (doi:10.1039/b9nj00398c), 2009-01-01
Supplement: b9nj00398c.pdf [file b9nj00398c.pdf]

## Supplementary data

### Autoxidation of 2-alkylidene-1,3-cyclohexanediones as a green process to form bicyclic hemiketal endoperoxides.

Virginie Bernat,<sup>a</sup> Marion Costes<sup>a</sup> and Christiane André-Barrès.\*

#### 2-(2-methylpropylidene)cyclopentan-1,3-dione (**5**)

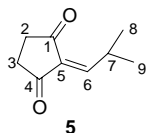

To isobutyraldehyde (309 mg, 4.285 mmol) solubilised in anhydrous dichloromethane (22 mL) is added piperidine (423  $\mu$ L, 4.285 mmol) at room temperature, under argon. Cyclopentanedione (400 mg, 4.077 mmol) is solubilised in anhydrous dichloromethane (22 mL) and piperidine (403  $\mu$ L, 4.077 mmol) is added. After 20 minutes, diketone solution is slowly poured on iminium solution. The mixture is shaken for thirty minutes then concentrated. Mannich base so obtained is dissolved in dichloromethane then treated by saturated  $\text{NH}_4\text{Cl}$  in HCl 1M solution. After 30 minutes, organic phase is washed with water then dried on magnesium sulfate, filtered and evaporated. Enone **5** (101 mg, 0.664 mmol) is obtained in 19% yield.

$^1\text{H}$  NMR (300 MHz,  $\text{CDCl}_3$ ,  $\delta$ ): 1.09 (d, 6H,  $\text{CH}_3$ -8/9,  $^3J_{\text{HH}} = 6.6$  Hz); 2.41-2.77 (m, ABX system, 6H,  $\text{CH}_2$ -2/3); 3.84 (m, 1H, CH-7); 7.08 (d, 1H, CH-6,  $^3J_{\text{HH}} = 10.5$  Hz)

#### Oxygen uptake on 5

Enone **5** (101 mg, 0.666 mmol), solubilised in dichloromethane, is left under air for ten days. After purification on column chromatography of sicagel (Petroleum ether/Ethyl acetate: 8/2) epoxide hemiketal **8** (23 mg, 0.125 mmol), epoxide **9** (5 mg, 0.030 mmol) and epoxide **10** (29 mg, 0.17 mmol) are obtained in respectively 25%, 8% and 26% yield.

#### Tetrahydro-6a-hydroxy-2,2-dimethyl-2H-4-oxiranyl-cyclopenta[b]furan-4(5H)-one (**8**)

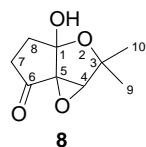

$R_f$  (PE/EtOAc: 7/3) = 0.14

$^1\text{H}$  NMR (300 MHz,  $\text{CDCl}_3$ ,  $\delta$ ): 1.36 (s, 3H,  $\text{CH}_3$ -9/10); 1.39 (s, 3H,  $\text{CH}_3$ -9/10); 2.13 (m, ABX system, 1H,  $\text{CH}_2$ -7); 2.56 (m, ABX system, 1H,  $\text{CH}_2$ -7); 2.65 (m, ABX system, 2H,  $\text{CH}_2$ -8); 3.84 (s, 1H, CH-4)  $^{13}\text{C}$  NMR (75 MHz,  $\text{CDCl}_3$ ,  $\delta$ ): 24.0-25.4 ( $\text{CH}_3$ -9/10); 31.9 ( $\text{CH}_2$ -7); 37.7 ( $\text{CH}_2$ -8); 72.7 (C-5); 73.0 (CH-4); 81.4 (C-3); 105.1 (C-1); 205.4 (C-6) MS (ESI, MeOH, positive mode,  $m/z$ ): 207  $[\text{MNa}]^+$  HRMS (DCI- $\text{CH}_4$ ,  $\text{CH}_2\text{Cl}_2$ , positive mode,  $m/z$ ): calculated for  $\text{C}_9\text{H}_{13}\text{O}_4$  185.0814, found 185.0824.

#### 3-hydroxy-2-(3,3-dimethyloxiran-2-yl)cyclopent-2-enone (**9**)

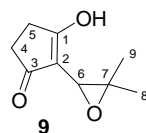

$R_f$  (PE/EtOAc: 7/3) = 0.36  $^1\text{H}$  NMR (500 MHz,  $\text{CDCl}_3$ ,  $\delta$ ): 1.31 (s, 3H,  $\text{CH}_3$ -8/9); 1.41 (s, 3H,  $\text{CH}_3$ -8/9); 2.15 (m, ABX system, 1H,  $\text{CH}_2$ -4); 2.54-2.73 (m, ABX system, 3H,  $\text{CH}_2$ -4/5); 3.46 (s, 1H, CH-6)  $^{13}\text{C}$  NMR (75 MHz,  $\text{CDCl}_3$ ,  $\delta$ ): 21.3-21.4 ( $\text{CH}_3$ -8/9); 28.6 ( $\text{CH}_2$ -4); 34.8 ( $\text{CH}_2$ -5); 63.3 (CH-6); 76.7 (C-7); 99.0 (C-2); 207.2 (C-1); 208.5 (C-3) MS (DCI/ $\text{CH}_4$ ,  $\text{CH}_2\text{Cl}_2$ , positive mode,  $m/z$ ): 169  $[\text{MH}]^+$  HRMS (DCI/ $\text{CH}_4$ ,  $\text{CH}_2\text{Cl}_2$ , positive mode,  $m/z$ ): calculated for  $\text{C}_9\text{H}_{13}\text{O}_3$  169.0865, found 169.0844.

### 2-(3,3-dimethyloxiran-1-yl)cyclopentane-1,3-dione (10)

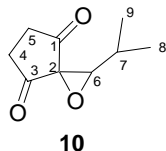

$R_f$  (PE/EtOAc: 7/3) = 0.64  $^1\text{H}$  NMR (500 MHz,  $\text{CDCl}_3$ ,  $\delta$ ): 0.85 (d, 3H,  $\text{CH}_3$ -8/9,  $^3J_{\text{HH}} = 6.9$  Hz); 1.14 (d, 3H,  $\text{CH}_3$ -8/9,  $^3J_{\text{HH}} = 6.7$  Hz); 1.95 (m, 1H, CH-7); 2.80-3.05 (m, ABX system, 4H,  $\text{CH}_2$ -4/5); 3.26 (d, 1H, CH-6,  $^3J_{\text{HH}} = 8.9$  Hz)  $^{13}\text{C}$  NMR (75 MHz,  $\text{CDCl}_3$ ,  $\delta$ ): 18.6-19.4 ( $\text{CH}_3$ -8/9); 26.4 (CH-7); 34.2-34.4 ( $\text{CH}_2$ -4/5); 63.1 (C-2); 78.1 (CH-6); 205.4-205.8 (C-1/3) MS (DCI/ $\text{CH}_4$ ,  $\text{CH}_2\text{Cl}_2$ , positive mode,  $m/z$ ): 169  $[\text{MH}]^+$  HRMS (DCI/ $\text{CH}_4$ ,  $\text{CH}_2\text{Cl}_2$ , positive mode,  $m/z$ ): calculated for  $\text{C}_9\text{H}_{13}\text{O}_3$  169.0865, found 169.0869.

### 6,7,8,8a-tetrahydro-8a-hydroxy-3,3-dimethylbenzo[c][1,2]dioxin-5(3H)-one (11)

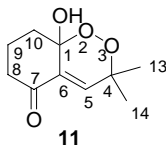

To isobutyraldehyde (171  $\mu\text{L}$ , 1.873 mmol) solubilised in anhydrous dichloromethane (10 mL) is added piperidine (185  $\mu\text{L}$ , 1.873 mmol) at room temperature, under argon. Cyclohexanedione (200 mg, 1.784 mmol) is solubilised in anhydrous dichloromethane (10 mL) and piperidine (176  $\mu\text{L}$ , 1.784 mmol) is added. After 25 minutes, dione solution is slowly poured on iminium solution. The mixture is shaken for thirty minutes then concentrated. Mannich base obtained as a yellow solid besides 10% of bis-adduct. The mixture is then dissolved in dichloromethane, treated by saturated  $\text{NH}_4\text{Cl}$  in HCl 1M solution. After 30 minutes, organic phase is washed with water then dried on magnesium sulfate, filtered and evaporated. Enone is solubilised in dichloromethane and left under air for 36 hours. Then the raw mixture is concentrated and purified on silicagel column chromatography (Petroleum ether/Ethyl acetate: 8/2). Endoperoxide **11** (255 mg, 1.288 mmol) is obtained as a white solid in 72% yield.

$R_f$  (PE/EtOAc: 8/2) = 0.06  $^1\text{H}$  NMR (300 MHz,  $\text{CDCl}_3$ ,  $\delta$ ): 1.32 (s, 3H,  $\text{CH}_3$ -13/14); 1.45 (s, 3H,  $\text{CH}_3$ -13/14); 1.71 (m, 1H, ABX system,  $\text{CH}_2$ -10); 1.98 (m, 1H, ABX system,  $\text{CH}_2$ -9); 2.15 (m, 2H, ABX system,  $\text{CH}_2$ -9/10); 2.34 (m, 1H, ABX system,  $\text{CH}_2$ -8); 2.68 (m, 1H, ABX system,  $\text{CH}_2$ -8); 3.65 (s, 1H, OH); 6.57 (s, 1H, CH-5)  $^{13}\text{C}$  NMR (75 MHz,  $\text{CDCl}_3$ ,  $\delta$ ): 17.9 ( $\text{CH}_2$ -9); 23.8-24.2 ( $\text{CH}_3$ -13/14); 31.2 ( $\text{CH}_2$ -10); 39.6 ( $\text{CH}_2$ -8); 79.4 (C-4); 97.5 (C-1); 136.7 (C-6); 139.4 (CH-5); 198.7 (C-7) IR (diamond compression system,  $\nu$ ): 3346 (OH); 3049 (=CH); 2974 à 2883 ( $\text{CH}_2$  et  $\text{CH}_3$ ); 1686 ( $\alpha,\beta$ -unsaturated C=O); 1641 (C=C); 1129 (C-O alcohol); 1101 (C-O peroxide) MS (ESI, MeOH, positive mode,  $m/z$ ): 221  $[\text{MNa}]^+$ ; 419  $[2\text{MNa}]^+$  HRMS (ESI, MeOH, positive mode,  $m/z$ ): calculated for  $\text{C}_{10}\text{H}_{14}\text{O}_4\text{Na}$  221.0790, found: 221.0784  $T_f$  (Büchi) = 103°C

### 7,8,9,9a-tetrahydro-9a-hydroxy-3,3-dimethyl-3H-cyclohepta[c][1,2]dioxin-5(6H)-one (12)

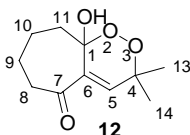

To isobutyraldehyde (180 mg, 2.496 mmol) solubilised in anhydrous dichloromethane (13 mL) is added piperidine (247  $\mu\text{L}$ , 2.496 mmol) at room temperature, under argon. Cycloheptanedione (300 mg, 2.378 mmol) is solubilised in anhydrous dichloromethane (13 mL) and piperidine (235  $\mu\text{L}$ , 2.378 mmol) is added. After 25 minutes, diketone solution is slowly poured on iminium solution. The mixture is shaken for thirty minutes then concentrated. Mannich base obtained as a yellow solid is dissolved in dichloromethane then treated by saturated  $\text{NH}_4\text{Cl}$  in HCl 1M solution. After 30 minutes, organic phase is washed with water then dried on magnesium sulfate, filtered and evaporated. Enone is irradiated in dichloromethane at 350 nm (Rayonet) for 30 mn then left under air for five days. Raw mixture is then concentrated and purified on silicagel column chromatography (Petroleum ether/Ethyl acetate: 9/1). Endoperoxide **12** (201 mg, 0.95 mmol) is obtained as a white solid in 40% yield.

$R_f$  (PE/EtOAc: 6/4) = 0.66  $^1\text{H}$  NMR (300 MHz,  $\text{CDCl}_3$ ,  $\delta$ ): 1.31 (s, 3H,  $\text{CH}_3$ -13/14); 1.44 (s, 3H,  $\text{CH}_3$ -13/14); 1.35-1.63 (m, 2H, ABX system,  $\text{CH}_2$ -9/10); 1.80-1.93 (m, 1H, ABX system,  $\text{CH}_2$ -11); 1.95-2.14 (m, 3H, ABX system,  $\text{CH}_2$ -9/10/11); 2.60 (m, 1H, ABX system,  $\text{CH}_2$ -8); 2.94 (m, ABX system, 1H,  $\text{CH}_2$ -8); 3.48 (s, 1H, OH); 6.96 (s, 1H, CH-5)  $^{13}\text{C}$  NMR (75 MHz,  $\text{CDCl}_3$ ,  $\delta$ ): 23.2-23.9 ( $\text{CH}_3$ -13/14); 24.3 ( $\text{CH}_2$ -10); 25.6 ( $\text{CH}_2$ -9); 35.8 ( $\text{CH}_2$ -11); 43.3 ( $\text{CH}_2$ -8); 78.4 (C-4); 97.5 (C-1); 135.2 (C-6); 142.5 (CH-5); 199.1 (C-7) IR (KBr,  $\nu$ ): 3387 (OH); 2989, 2860 ( $\text{CH}_2$  et  $\text{CH}_3$ ); 1676 ( $\alpha,\beta$ -unsaturated C=O); 1619 (C=C); 1115 (C-O alcohol); 1101 (C-O peroxyde) MS (ESI, MeOH, positive mode,  $m/z$ ): 235  $[\text{MNa}]^+$ ; 447  $[2\text{MNa}]^+$  HRMS (ESI, MeOH, positive mode,  $m/z$ ): calculated for  $\text{C}_{11}\text{H}_{16}\text{O}_4\text{Na}$  235.0946, found: 235.0949  $T_f$  (Büchi) = 76°C

### Endoperoxide 13

To isobutyraldehyde (241  $\mu\text{L}$ , 2.641 mmol) solubilised in anhydrous dichloromethane (13 mL) is added piperidine (261  $\mu\text{L}$ , 2.641 mmol) at room temperature, under argon. 5-Phenylcyclohexanedione (497 mg, 2.641 mmol) is solubilised in anhydrous dichloromethane (13 mL) and piperidine (131  $\mu\text{L}$ , 1.320 mmol) is added. After 25 minutes, diketone solution is slowly

poured on iminium solution. The mixture is shaken for ninety minutes then concentrated. Mannich base obtained as a yellow solid, is dissolved in dichloromethane then treated by saturated  $\text{NH}_4\text{Cl}$  in  $\text{HCl}$  1M solution. After 30 minutes, organic phase is washed with water then dried on magnesium sulfate, filtered and evaporated. Enone is left under air for 24 hours. Raw mixture is then concentrated and purified on silicagel column chromatography (Petroleum ether/Ethyl acetate: 7/3). Endoperoxide **13** (386 mg, 1,407 mmol) is obtained as a white solid in 53% yield, besides Michael bis-adduct **13bis** (182 mg, 0.423 mmol) as a white solid in 16%.

### 6,7,8,8a-tetrahydro-8a-hydroxy-3,3-dimethyl-7-phenylbenzo[c][1,2]dioxin-5(3H)-one (**13**)

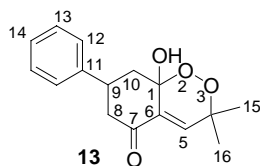

$R_f$  (PE/EtOAc: 7/3) = 0.40  $^1\text{H}$  NMR (300 MHz,  $\text{CDCl}_3$ ,  $\delta$ ): 1.41 (s, 3H,  $\text{CH}_3$ -15/16); 1.55 (s, 3H,  $\text{CH}_3$ -15/16); 2.04 (m, 1H, ABX system,  $\text{CH}_2$ -10); 2.46 (m, 1H, ABX system,  $\text{CH}_2$ -10); 2.55 (m, 1H, ABX system,  $\text{CH}_2$ -8); 2.94 (m, 1H, ABX system,  $\text{CH}_2$ -8); 3.61 (m, 1H, CH-9); 3.75 (1H, OH); 6.69 (s, 1H, CH-5); 7.29-7.39 (m, 5H, CH-12/13/14)  $^{13}\text{C}$  NMR (75 MHz,  $\text{CDCl}_3$ ,  $\delta$ ): 23.5 and 23.9 ( $\text{CH}_3$ -15/16); 35.6 (CH-9); 38.1 ( $\text{CH}_2$ -10); 47.6 ( $\text{CH}_2$ -8); 79.1 (C-4); 96.9 (C-1); 126.7-127.0-128.9 (CH-12/13/14); 135.9 (C-6); 139.3 (CH-5); 142.7 (C-11); 197.7 (C-7) IR (KBr,  $\nu$ ): 3387 (OH); 3071, 3028, 3005 ( $=\text{CH}$ ); 2980 to 2933 (CH,  $\text{CH}_2$  and  $\text{CH}_3$ ); 1687 ( $\alpha,\beta$ -unsaturated  $\text{C}=\text{O}$ ); 1635 ( $\text{C}=\text{C}$ ); 1135 (C-O peroxide); 1103 (C-O, alcohol); 702 (O-O) MS (ESI, MeOH, positive mode,  $m/z$ ): 297  $[\text{MNa}]^+$ ; 571  $[2\text{MNa}]^+$  HRMS (ESI, MeOH, positive mode,  $m/z$ ): calculated for  $\text{C}_{16}\text{H}_{18}\text{O}_4\text{Na}$  297.1103, found: 297.1095  $T_f$  (Büchi) = 149°C

### 3-hydroxy-2-(1-(2-hydroxy-6-oxo-4-phenylcyclohex-1-enyl)-2-methylpropyl)-5-phenylcyclohex-2-enone (**13 bis**)

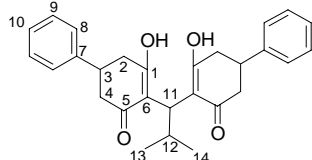

$R_f$  (PE/EtOAc: 7/3) = 0,74  $^1\text{H}$  NMR (300 MHz,  $\text{CDCl}_3$ ,  $\delta$ ): 0.91 (d, 6H,  $\text{CH}_3$ -13/14,  $^3J_{\text{HH}} = 6.4$  Hz); 2.48-2.87 (m, 8H, ABX system,  $\text{CH}_2$ -4/6); 2.96 (m, 1H, CH-11); 3.25 (m, 2H, ABX system, CH-5); 3.48 (m, 1H, CH-12); 7.19-7.41 (m, 10H, CH-8/9/10); 12.96 (1H, OH)  $^{13}\text{C}$  NMR (75 MHz,  $\text{CDCl}_3$ ,  $\delta$ ): 21.9 ( $\text{CH}_3$ -13/14); 25.4 (CH-11); 38.2 (CH-3); 38.5 (CH-12); 40.2 and 40.7 ( $\text{CH}_2$ -2/4); 116.9 (C-6); 126.6-127.1-128.8 (CH-8/9/10); 142.1 (C-7); 189.8 (C-1); 191.0 (C-5) MS (ESI,  $\text{CH}_2\text{Cl}_2/\text{MeOH}$ , positive mode,  $m/z$ ): 453  $[\text{MNa}]^+$

### 3-cyclopentyl- 6,7,8,8a-tetrahydro-8a-hydroxy-7-phenylbenzo[c][1,2]dioxin-5(3H)-one (**14**)

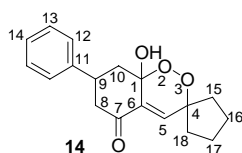

The same protocol as precedent is followed using cyclopentanecarboxaldehyde (284  $\mu\text{L}$ , 2.656 mmol) and 5-phenylcyclohexanedione (500 mg, 2,656 mmol). After two days for oxygen uptake and purification on silicagel column chromatography (Petroleum ether/Ethyl acetate: 8/2), endoperoxide **14** (525 mg, 1.748 mmol) is obtained as a white solid in 66% yield.

$R_f$  (PE/EtOAc: 8/2) = 0.25  $^1\text{H}$  NMR (300 MHz,  $\text{CDCl}_3$ ,  $\delta$ ): 1.55-1.94 (m, 8H,  $\text{CH}_2$ -15/16/17/18); 1.98 (m, ABX system, 1H,  $\text{CH}_2$ -10); 2.31 (m, ABX system, 1H,  $\text{CH}_2$ -10); 2.52 (m, 1H, ABX system,  $\text{CH}_2$ -8); 2.88 (m, 1H, ABX system,  $\text{CH}_2$ -8); 3.56 (m, 1H, CH-9); 3.75 (s, 1H, OH); 6.67 (s, 1H, CH-5); 7.21-7.40 (m, 5H, CH-12/13/14)  $^{13}\text{C}$  NMR (75 MHz,  $\text{CDCl}_3$ ,  $\delta$ ): 24.4 and 24.8 ( $\text{CH}_2$ -16/17); 35.7 (CH-9); 35.7 and 35.8 ( $\text{CH}_2$ -15/18); 38.1 ( $\text{CH}_2$ -10); 47.5 ( $\text{CH}_2$ -8); 90.2 (C-4); 97.2 (C-1); 126.7; 127.1 and 128.9 (CH-12/13/14); 136.1 (C-6); 139.0 (CH-5); 142.7 (C-11); 197.6 (C-7) IR (KBr,  $\nu$ ): 3353 (OH); 3054 ( $=\text{CH}$ ); 2976 to 2871 (CH,  $\text{CH}_2$  and  $\text{CH}_3$ ); 1685 ( $\alpha,\beta$ -unsaturated  $\text{C}=\text{O}$ ); 1637 ( $\text{C}=\text{C}$ ); 1100 (C-O peroxide); 1043 (C-O alcohol); 764 (O-O) MS (ESI,  $\text{CH}_2\text{Cl}_2/\text{MeOH}$ , positive mode,  $m/z$ ): 323  $[\text{MNa}]^+$ ; 623  $[2\text{MNa}]^+$  HRMS (ESI, MeOH, positive mode,  $m/z$ ): calculated for  $\text{C}_{18}\text{H}_{20}\text{O}_4\text{Na}$  323.1259, found: 323.1271  $T_f$  (Büchi) = 127°C

### 3-cyclohexyl- 6,7,8,8a-tetrahydro-8a-hydroxy-7-phenylbenzo[c][1,2]dioxin-5(3H)-one (**15**)

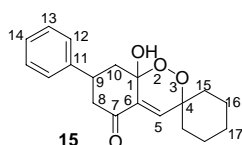

The same protocol as precedent is followed using cyclohexanecarboxaldehyde (250 mg, 2.229 mmol) and 5-phenylcyclohexanedione (400 mg, 2.123 mmol). After two days for oxygen uptake and purification on silicagel column chromatography (Petroleum ether/Ethyl acetate: 8/2), endoperoxide **15** (481 mg, 1.530 mmol) is obtained as a white solid in 72% yield.

$R_f$  (PE/EtOAc: 8/2) = 0.17  $^1\text{H}$  NMR (300 MHz,  $\text{CDCl}_3$ ,  $\delta$ ): 1.30-2.09 (m, ABX system, 11H,  $\text{CH}_2$ -10/15/16/17); 2.34 (m, ABX system, 1H,  $\text{CH}_2$ -10); 2.53 (m, ABX system, 1H,  $\text{CH}_2$ -8); 2.90 (m, 1H, ABX system,  $\text{CH}_2$ -8); 3.58 (m, 1H, CH-9); 3.75 (s, 1H, OH); 6.69 (s, 1H, CH-5); 7.20-7.42 (m, 5H, CH-12/13/14)  $^{13}\text{C}$  NMR (75 MHz,  $\text{CDCl}_3$ ,  $\delta$ ): 21.0-21.2 ( $\text{CH}_2$ -16); 25.0 ( $\text{CH}_2$ -17); 31.8-32.9 ( $\text{CH}_2$ -15); 35.6 (CH-9); 38.1 ( $\text{CH}_2$ -10); 47.6 ( $\text{CH}_2$ -8); 80.3 (C-4); 97.2 (C-1); 126.7-127.1-128.9 (CH-12/13/14); 136.3 (C-6); 139.2 (CH-5); 142.7 (C-11); 197.8 (C-7) IR (diamond compression system,  $\nu$ ): 3380 (OH); 2934 to 2854 (CH,  $\text{CH}_2$  and  $\text{CH}_3$ ); 1684 ( $\alpha,\beta$ -unsaturated C=O); 1642 (C=C); 1132 (C-O peroxide). MS (ESI, MeOH, positive mode,  $m/z$ ): 337 [ $\text{MNa}$ ] $^+$ ; 651 [ $2\text{MNa}$ ] $^+$  HRMS (ESI, MeOH, positive mode,  $m/z$ ): calculated for  $\text{C}_{19}\text{H}_{22}\text{O}_4\text{Na}$  337.1416, found: 337.1474; calculated for  $\text{C}_{38}\text{H}_{44}\text{O}_8\text{Na}$  651.2934, found: 651.3004  $T_f$  (Büchi) = 122°C

#### 6,7,8,8a-tetrahydro-8a-hydroxy-3,3-dimethyl-7-(4-fluorophenyl)benzo[c][1,2]dioxin-5(3H)-one (16)

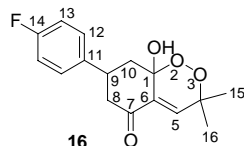

To isobutyraldehyde (175 mg, 2.439 mmol) solubilised in anhydrous dichloromethane (13 mL) is added piperidine (241  $\mu\text{L}$ , 2.439 mmol) at room temperature, under argon. 5-Fluorophenylcyclohexanedione (503 mg, 2.439 mmol) is solubilised in anhydrous dichloromethane (13 mL) and piperidine (241  $\mu\text{L}$ , 2.439 mmol) is added. After 25 minutes, diketone solution is slowly poured on iminium solution. The mixture is shaken for two hours then concentrated. Mannich base obtained as a yellow solid, is dissolved in dichloromethane then treated by saturated  $\text{NH}_4\text{Cl}$  in HCl 1M solution. After 30 minutes, organic phase is washed with water then dried on magnesium sulfate, filtered and evaporated. Enone is left under air for 6 days. Raw mixture is then concentrated and purified on silicagel column chromatography (Petroleum ether/Ethyl acetate: 8/2). Endoperoxide **16** (386 mg, 1,407 mmol) is obtained as a white solid in 64% yield.

$R_f$  (PE/EtOAc: 7/3) = 0.28  $^1\text{H}$  NMR (300 MHz,  $\text{CDCl}_3$ ,  $\delta$ ): 1.36 (s, 3H,  $\text{CH}_3$ -15/16); 1.49 (s, 3H,  $\text{CH}_3$ -15/16); 1.94 (m, 1H, system ABX,  $\text{CH}_2$ -10); 2,30 (m, 1H, ABX system,  $\text{CH}_2$ -10); 2,46 (m, 1H, ABX system,  $\text{CH}_2$ -8); 2.86 (m, 1H, ABX system,  $\text{CH}_2$ -8); 3.54 (m, 1H, CH-9); 3.77 (s, 1H, OH); 6.63 (s, 1H, CH-5); 7.01 (d, 1H, CH-12,  $^3J_{\text{HH}} = 8.6$  Hz); 7.04 (d, 1H, CH-12,  $^3J_{\text{HH}} = 8.6$  Hz); 7.18 (d, 1H, CH-13,  $^3J_{\text{HH}} = 5.3$  Hz); 7.21 (d, 1H, CH-13,  $^3J_{\text{HH}} = 5.3$  Hz)  $^{13}\text{C}$  NMR (75 MHz,  $\text{CDCl}_3$ ,  $\delta$ ): 23.5-23.9 ( $\text{CH}_3$ -15/16); 35.0 (CH-9); 38.2 ( $\text{CH}_2$ -10); 47.7 ( $\text{CH}_2$ -8); 79.2 (C-4); 96.8 (C-1); 115.6-115.8 (CH-13); 128.1-128.2 (CH-12); 135.7 (C-6); 138.4 (C-11); 139.5 (CH-5); 161.8 (d, C-14,  $^1J_{\text{CF}} = 245$  Hz); 197.4 (C-7)  $^{19}\text{F}$  NMR (282 MHz,  $\text{CDCl}_3$ ,  $\delta$ , Reference:  $\text{CFCl}_3$ ): 115.5ppm. IR (KBr,  $\nu$ ): 3343 (OH); 3049 (=CH); 2980 to 2867 (CH,  $\text{CH}_2$  et  $\text{CH}_3$ ); 1687 ( $\alpha,\beta$ -unsaturated C=O); 1642 (C=C); 1106 (C-O peroxide); 1038 (C-O alcohol) MS (ESI, MeOH, positive mode,  $m/z$ ): 315 [ $\text{MNa}$ ] $^+$ ; 607 [ $2\text{MNa}$ ] $^+$  HRMS (ESI, MeOH, positive mode,  $m/z$ ): calculated for  $\text{C}_{16}\text{H}_{17}\text{O}_4\text{FNa}$ : 315.1009, found: 315.1030. Calculated for  $\text{C}_{32}\text{H}_{34}\text{O}_8\text{F}_2\text{Na}$ , 607.2119, found: 607.2141  $T_f$  (Büchi) = 138°C

#### 6,7,8,8a-tetrahydro-8a-hydroxy-3,3 dimethyl-7-(benzo[d][1,3]dioxol-5-yl)benzo[c][1,2]dioxin-5(3H)-one (17)

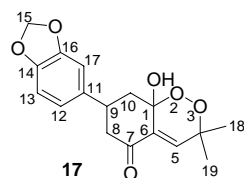

To isobutyraldehyde (163 mg, 2.260 mmol) solubilised in anhydrous dichloromethane (13 mL) is added piperidine (224  $\mu\text{L}$ , 3.057 mmol) at room temperature, under argon. 5-(Benzo[d][1,3]dioxol-5-yl)cyclohexane-1,3-dione (500 mg, 2,153 mmol) is solubilised in anhydrous dichloromethane (13 mL) and piperidine (213  $\mu\text{L}$ , 2.153 mmol) is added. After 25 minutes, diketone solution is slowly poured on iminium solution. The mixture is shaken for two hours then concentrated. Mannich base obtained as a yellow solid, is dissolved in dichloromethane then treated by saturated  $\text{NH}_4\text{Cl}$  in HCl 1M solution. After 30 minutes, organic phase is washed with water then dried on magnesium sulfate, filtered and evaporated. Enone is left under air for 2 days. Raw mixture is then concentrated and purified on silicagel column chromatography (Petroleum ether/Ethyl acetate: 8/2). Endoperoxide **17** (370 mg, 1.162 mmol) is obtained as a white solid in 54% yield.

$R_f$  (PE/EtOAc: 7/3) = 0.20  $^1\text{H}$  NMR (300 MHz,  $(\text{CD}_3)_2\text{CO}$ ,  $\delta$ ): 1.28 (s, 3H,  $\text{CH}_3$ -18/19); 1.37 (s, 3H,  $\text{CH}_3$ -18/19); 1.96 (m, 2H,  $\text{CH}_2$ -10); 2.59 (m, 2H,  $\text{CH}_2$ -8); 3.31 (m, 1H, CH-9); 5.97 (s, 2H,  $\text{CH}_2$ -15); 6.55 (s, 1H, CH-5); 6.74-6.86 (m, 2H, CH-12/17); 6.97 (d, 1H, CH-13,  $^3J_{\text{HH}} = 1.5$  Hz); 7.04 (s, 1H, OH)  $^{13}\text{C}$  NMR (75 MHz,  $(\text{CD}_3)_2\text{CO}$ ,  $\delta$ ): 22.7-23.9 ( $\text{CH}_2$ -18/19); 35.4 (CH-9); 38.6 ( $\text{CH}_2$ -10); 47.2 ( $\text{CH}_2$ -8); 78.0 (C-4); 96.0 (C-1); 100.7 ( $\text{CH}_2$ -15); 107.4 (CH-13); 108.1-120.0 (CH-12/17); 135.4 (C-6); 137.5 (C-11); 138.1 (CH-5); 145.7-147.4 (C-14/16); 197.8 (C-7) IR (KBr,  $\nu$ ): 3322 (OH); 3051 (=CH); 2999 to 2790 (CH,  $\text{CH}_2$  and  $\text{CH}_3$ ); 1684 ( $\alpha,\beta$ -insaturated C=O); 1644 (C=C ethylenic); 1102 (C-O peroxide); 1038 (C-O alcohol) MS (FAB, MNBA matrix, DMSO, positive mode,  $m/z$ ): 318 [M]  $T_f$  (Büchi) = 144°C

#### 6,7,8,8a-tetrahydro-8a-hydroxy-3,3-dimethyl-7-(furan-2-yl)benzo[c][1,2]dioxin-5(3H)-one (18)

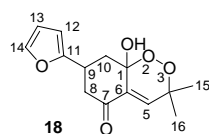

The same protocol as precedent is followed. After two days for oxygen uptake and purification on silicagel column chromatography (Petroleum ether/Ethyl acetate: 8/2), endoperoxide **18** (147 mg, 0.556 mmol) is obtained as a white solid in 22% yield.

$R_f$  (PE/EtOAc: 1/1) = 0.66 RMN  $^1\text{H}$  (300 MHz,  $\text{CDCl}_3$ ,  $\delta$ ): 1.35 (s, 3H,  $\text{CH}_3$ -15/16); 1.47 (s, 3H,  $\text{CH}_3$ -15/16); 1.93 (m, 1H, ABX system,  $\text{CH}_2$ -10); 2.43 (m, 1H, ABX system,  $\text{CH}_2$ -10); 2.55 (m, 1H, ABX system,  $\text{CH}_2$ -8); 2.96 (m, 1H, ABX system,  $\text{CH}_2$ -8); 3.65 (m, 1H, CH-9); 3.66 (1H, OH); 6.07 (d, 1H, CH-12,  $^3J_{\text{HH}} = 3.2$  Hz); 6.30 (d, 1H, CH-13,  $^3J_{\text{HH}} = 3.2$  Hz,  $^3J_{\text{HH}} = 1.9$  Hz); 6.64 (s, 1H, CH-5); 6.07 (d, 1H, CH-14,  $^3J_{\text{HH}} = 1.9$  Hz)  $^{13}\text{C}$  NMR (75 MHz,  $\text{CDCl}_3$ ,  $\delta$ ): 23.5 and 23.9 ( $\text{CH}_2$ -15/16); 29.7 (CH-9); 36.0 ( $\text{CH}_2$ -10); 44.2 ( $\text{CH}_2$ -8); 79.2 (C-4); 96.6 (C-1); 104.7 (CH-12); 110.1 (CH-13); 135.7 (C-6); 139.6 (CH-5); 141.7 (CH-14); 155.7 (C-11); 196.8 (C-7) IR (KBr,  $\nu$ ): 3357 (OH); 3157-3131-3055 (CH ethylenic); 2979, 2933 (CH,  $\text{CH}_2$  and  $\text{CH}_3$ ); 1689 ( $\alpha,\beta$ -unsaturated C=O); 1640 (C=C); 1136 (C-O peroxide); 1102 (C-O alcohol) MS (ESI,  $\text{CH}_2\text{Cl}_2/\text{MeOH}$ , positive mode,  $m/z$ ): 287  $[\text{MNa}]^+$ ; 551  $[2\text{MNa}]^+$  HRMS (ESI, MeOH, positive mode,  $m/z$ ): calculated for  $\text{C}_{14}\text{H}_{16}\text{O}_5\text{Na}$ : 287.0895, found: 287.0912  $T_f$  (Büchi) = 112°C

**7,8,9,9a-tetrahydro-9a-hydroxy-3-cyclohexyl-3H-cyclohepta[c][1,2]dioxin-5(6H)-one (19)**

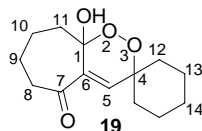

Following the same protocol as previously, cyclohexanecarboxaldehyde (253  $\mu\text{L}$ , 2.093 mmol) and 1,3-cycloheptanedione (240 mg, 1.903 mmol) gave enone in 62% yield from raw mixture  $^1\text{H}$  NMR analysis. Enone is solubilised in dichloromethane and left under air. After 30 days, endoperoxide **19** (110 mg, 0.0436 mmol) is obtained as a pale yellow solid after purification silicagel column chromatography (EP/AcOEt: 9/1 then 8/2) in 23 % yield from cycloheptadione.

$R_f$  (PE/EtOAc: 7/3) = 0.57  $^1\text{H}$  NMR (300 MHz,  $\text{CDCl}_3$ ,  $\delta$ ): 1.58-2.48 (m, ABX system, 16H,  $\text{CH}_2$ -9/10/11/12/13/14); 2.85 (m, ABX system, 1H,  $\text{CH}_2$ -8); 3.22 (m, ABX system, 1H,  $\text{CH}_2$ -8); 4.18 (s, 1H, OH); 7.56 (s, 1H, CH-5)  $^{13}\text{C}$  NMR (75 MHz,  $\text{CDCl}_3$ ,  $\delta$ ): 21.0-21.1-24.4-25.1 ( $\text{CH}_2$ -9/10/13/14); 31.1-33.1 ( $\text{CH}_2$ -12); 35.8 ( $\text{CH}_2$ -11); 43.2 ( $\text{CH}_2$ -8); 79.3 (C-4); 97.7 (C-1); 137.4 (C-6); 142.4 (CH-5); 199.3 (C-7). MS (DCI/ $\text{CH}_4$ ,  $\text{CH}_2\text{Cl}_2$ , positive mode,  $m/z$ ): 235  $[\text{MH}]^+ - \text{H}_2\text{O}$ .
